# Supplementary material for: An Integrated Electrochemical System for Synergistic Cathodic Nitrate Reduction and Anodic Sulfite Oxidation
Source: MDPI journal article supplement (doi:10.3390/molecules28124666), 2023-06-09
Supplement: s1 [file s1]

*Supporting Information*

# **An Integrated Electrochemical System for Synergistic Cathodic Nitrate Reduction and Anodic Sulfite Oxidation**

**Bing Cui <sup>1</sup>, Shizhao Wang <sup>1</sup>, Xiaofu Guo <sup>1</sup>, Yingying Zhao <sup>1,\*</sup> and Sohrab Rohani <sup>2,\*</sup>**

<sup>1</sup> Tianjin Key Laboratory of Chemical Process Safety, Hebei Collaborative Innovation Center of Modern Marine Chemical Technology, Engineering Research Center of Seawater Utilization of Ministry of Education, School of Chemical Engineering and Technology, Hebei University of Technology, Tianjin 300130, China; cuibing23412@163.com (B.C.); shizhaow@163.com (S.W.); guoxiaofu@hebut.edu.cn (X.G.)

<sup>2</sup> Department of Chemical and Biochemical Engineering, Western University, London, ON N6A 5B9, Canada

\* Correspondence: luckyzhaoyy@126.com (Y.Z.); srohani@uwo.ca (S.R.)

## S1. Analytical methods for NO<sub>3</sub><sup>-</sup>RR

### S1.1 Testing methods for the ions

The ionic testing methods for NO<sub>3</sub><sup>-</sup>RR are same with the reported work.

### S1.2 Calculation methods for relevant parameters

The removal efficiency of NO<sub>3</sub><sup>-</sup>-N ( $R(\text{NO}_3^--\text{N})$ ), selectivity of NO<sub>2</sub><sup>-</sup>-N ( $S(\text{NO}_2^--\text{N})$ ), selectivity of NH<sub>4</sub><sup>+</sup>-N ( $S(\text{NH}_4^+-\text{N})$ ), can be calculated using **Eqs. S1-S3**.

$$R(\text{NO}_3^--\text{N}) = \frac{C_0(\text{NO}_3^--\text{N}) - C_t(\text{NO}_3^--\text{N})}{C_0(\text{NO}_3^--\text{N})} \times 100\% \quad (\text{S1})$$

$$S(\text{NO}_2^--\text{N}) = \frac{C_t(\text{NO}_2^--\text{N}) - C_0(\text{NO}_2^--\text{N})}{C_0(\text{NO}_3^--\text{N}) - C_t(\text{NO}_3^--\text{N})} \times 100\% \quad (\text{S2})$$

$$S(\text{NH}_4^+-\text{N}) = \frac{C_t(\text{NH}_4^+-\text{N}) - C_0(\text{NH}_4^+-\text{N})}{C_0(\text{NO}_3^--\text{N}) - C_t(\text{NO}_3^--\text{N})} \times 100\% \quad (\text{S3})$$

where  $C_0(\text{NO}_3^--\text{N})$ ,  $C_0(\text{NO}_2^--\text{N})$  and  $C_0(\text{NH}_4^+-\text{N})$  are the initial concentrations of NO<sub>3</sub><sup>-</sup>-N, NO<sub>2</sub><sup>-</sup>-N, and NH<sub>4</sub><sup>+</sup>-N, respectively,  $C_t(\text{NO}_3^--\text{N})$ ,  $C_t(\text{NO}_2^--\text{N})$  and  $C_t(\text{NH}_4^+-\text{N})$  are the concentrations of NO<sub>3</sub><sup>-</sup>-N, NO<sub>2</sub><sup>-</sup>-N, and NH<sub>4</sub><sup>+</sup>-N at time  $t$ , respectively,

Furthermore, the kinetics was fitted by pseudo-first order model (**Eq. 4**):

$$-\ln \left[ \frac{C_t}{C_0} \right] = k_r t + A \quad (\text{S4})$$

where  $k_r$  and  $A$  are fitting constants.

## S2. Analytical methods for SOR

### S2.1 Testing methods for the SO<sub>3</sub><sup>2-</sup>

The SO<sub>3</sub><sup>2-</sup> concentration was detected using the iodometric method (HG/T 2784-2012), which involved the following procedure:

(1) 5 mL of iodine standard solution was taken in an iodine flask and the volume

was marked as  $V_1$ . Then, 1 mL of the test solution containing  $\text{SO}_3^{2-}$  was added and mixed well;

(2)  $\text{Na}_2\text{S}_2\text{O}_3$  solution was used to titrate the solution until it turned pale yellow, and then 2 mL of starch solution was added;

(3) The titration was continued with  $\text{Na}_2\text{S}_2\text{O}_3$  solution until the blue color just faded away, and the volume of  $\text{Na}_2\text{S}_2\text{O}_3$  solution consumed was recorded as  $V_2$ ;

(4) A blank experiment was performed without the addition of the test solution containing sulfite ions, and the volume of  $\text{Na}_2\text{S}_2\text{O}_3$  solution consumed was recorded as  $V_0$ .

## S2.2 Calculation methods for relevant parameters

The concentration of  $\text{SO}_3^{2-}$  ( $C(\text{SO}_3^{2-})$ ) and the oxidation rate ( $O(\text{SO}_3^{2-})$ ) were calculated using **Eqs. S5-S6**.

$$C(\text{SO}_3^{2-}\text{-S}) = \frac{16 \times (V_0 - V_2) \times C_{\text{Na}_2\text{S}_2\text{O}_3}}{V_1} \quad (\text{S5})$$

$$O(\text{SO}_3^{2-}\text{-S}) = \frac{C_0(\text{SO}_3^{2-}\text{-S}) - C_t(\text{SO}_3^{2-}\text{-S})}{C_0(\text{SO}_3^{2-}\text{-S})} \quad (\text{S6})$$

where  $C_0(\text{SO}_3^{2-})$  and  $C_t(\text{SO}_3^{2-})$  are the concentrations of  $\text{SO}_3^{2-}\text{-S}$  at time 0 and  $t$ , respectively,  $C_{\text{Na}_2\text{S}_2\text{O}_3}$  represents the concentration of added  $\text{Na}_2\text{S}_2\text{O}_3$  solution. The kinetics was also fitted by pseudo-first order model ( $k_o$  and  $B$  are fitting constants).

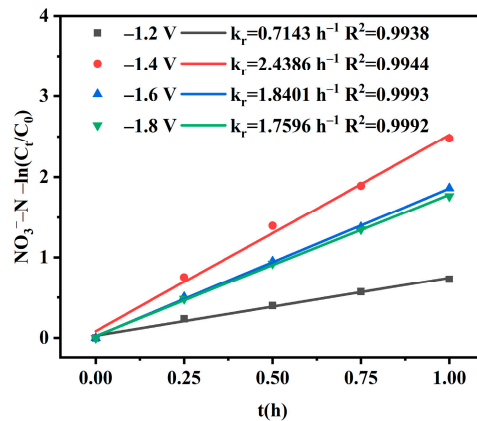

**Figure S1.** Fitting results of pseudo-first-order kinetic model for single electrochemical reduction of nitrate at different potentials.

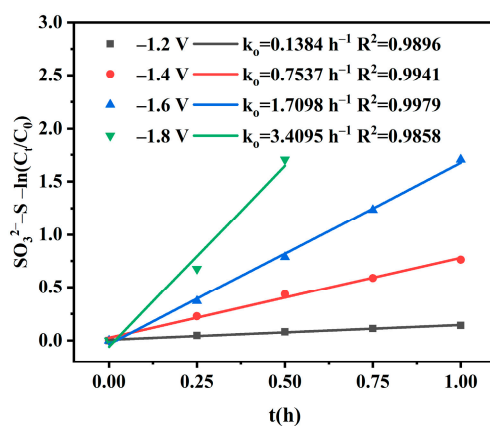

**Figure S2.** Fitting results of pseudo-first-order kinetic model for single electrochemical oxidation of sulfite at different potentials.

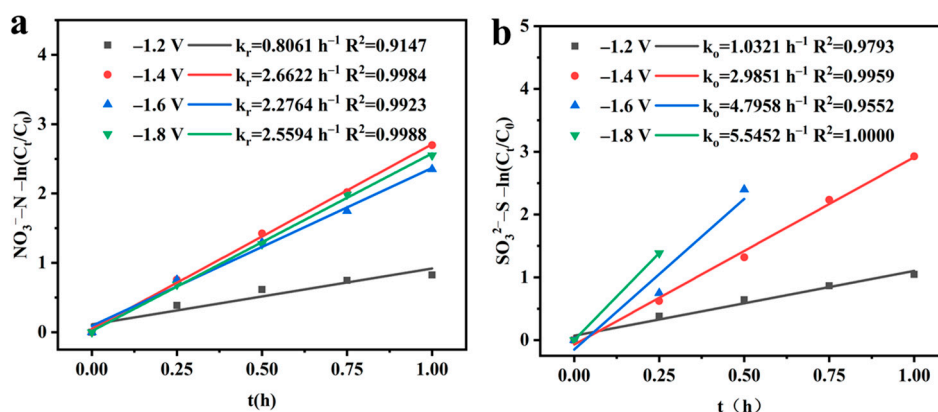

**Figure S3.** Fitting results of pseudo-first-order kinetic model for integrated electrochemical system at different potentials; (a) nitrate reduction reaction; (b) sulfite oxidation reaction.

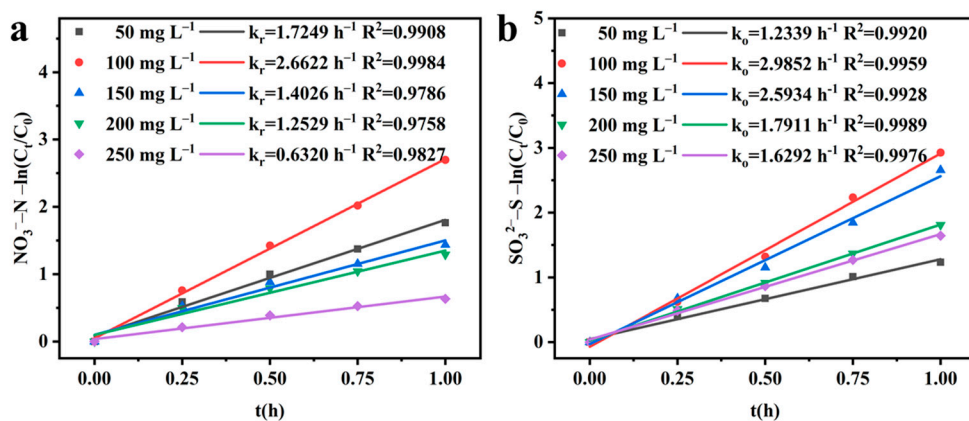

**Figure S4.** Fitting results of pseudo-first-order kinetic model for integrated electrochemical system at different initial  $\text{NO}_3^- - \text{N}$  concentrations; (a) nitrate reduction reaction; (b) sulfite oxidation reaction.

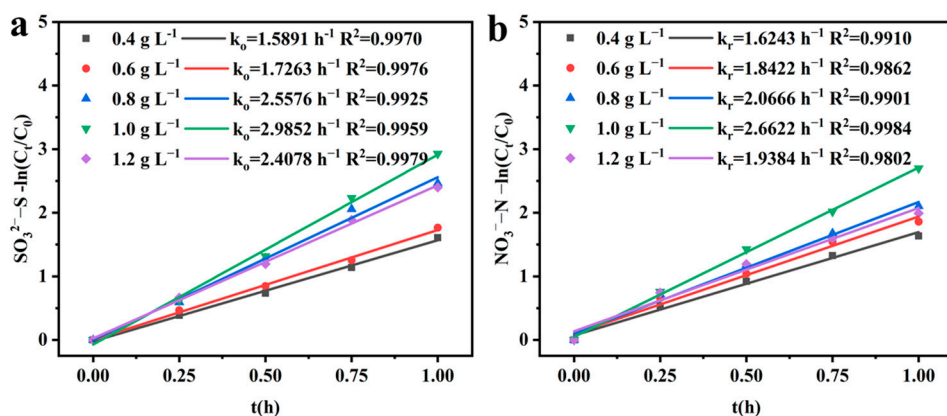

**Figure S5.** Fitting results of pseudo-first-order kinetic model for integrated electrochemical system at different initial  $\text{SO}_3^{2-} - \text{S}$  concentrations; (a) sulfite oxidation reaction; (b) nitrate reduction reaction.
